# Supplementary material
Source: Research Square preprint supplement (doi:10.21203/rs.3.rs-9245128/v1)

**
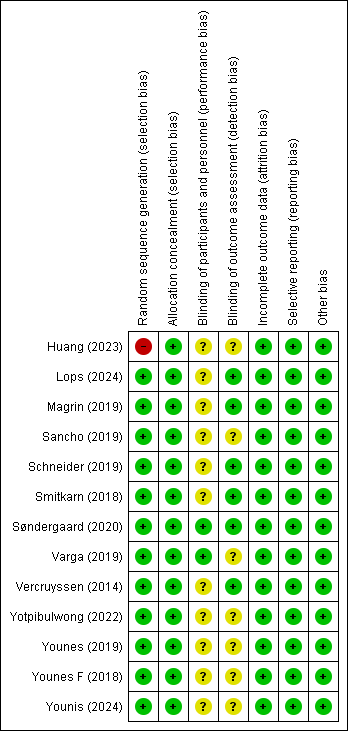
**

**Appendix 1. Risk of bias**

Supplement: Supplementary file 1 [file 320ff476494f6778f8cd1fa4.docx]
